# Supplementary material for: TCR meta-clonotypes for biomarker discovery with tcrdist3 enabled identification of public, HLA-restricted clusters of SARS-CoV-2 TCRs
Source: PubMed Central journal article supplement (PMC8631793; doi:10.7554/elife.68605), 2021-11-30
Supplement: elife-68605-transrepform1.pdf [file elife-68605-transrepform1.pdf]

## eLife's transparent reporting form

We encourage authors to provide detailed information *within their submission* to facilitate the interpretation and replication of experiments. Authors can upload supporting documentation to indicate the use of appropriate reporting guidelines for health-related research (see [EQUATOR Network](#)), life science research (see the [BioSharing Information Resource](#)), or the [ARRIVE guidelines](#) for reporting work involving animal research. Where applicable, authors should refer to any relevant reporting standards documents in this form.

If you have any questions, please consult our Journal Policies and/or contact us: [editorial@elifesciences.org](mailto:editorial@elifesciences.org).

### Sample-size estimation

- You should state whether an appropriate sample size was computed when the study was being designed
- You should state the statistical method of sample size computation and any required assumptions
- If no explicit power analysis was used, you should describe how you decided what sample (replicate) size (number) to use

Please outline where this information can be found within the submission (e.g., sections or figure legends), or explain why this information doesn't apply to your submission:

No power analysis was conducted before the study design. We used a large publicly available set of bulk TCR beta-chain repertoires from COVID-19 patients available in the ImmuneRACE 2.0 release.

### Replicates

- You should report how often each experiment was performed
- You should include a definition of biological versus technical replication
- The data obtained should be provided and sufficient information should be provided to indicate the number of independent biological and/or technical replicates
- If you encountered any outliers, you should describe how these were handled
- Criteria for exclusion/inclusion of data should be clearly stated
- High-throughput sequence data should be uploaded before submission, with a private link for reviewers provided (these are available from both GEO and ArrayExpress)

Please outline where this information can be found within the submission (e.g., sections or figure legends), or explain why this information doesn't apply to your submission:

We analyzed bulk TCR beta repertoires from COVID-19 patients available in the publicly available ImmuneRACE 2.0 release with the inclusion criteria that sample meta-data was available indicating time from diagnosis between 0-30 days as specified in Methods section "TCR data: immuneRACE datasets and MIRA assay." Neither technical nor biological replicates were available in this data source.

## Statistical reporting

- Statistical analysis methods should be described and justified
- Raw data should be presented in figures whenever informative to do so (typically when N per group is less than 10)
- For each experiment, you should identify the statistical tests used, exact values of N, definitions of center, methods of multiple test correction, and dispersion and precision measures (e.g., mean, median, SD, SEM, confidence intervals; and, for the major substantive results, a measure of effect size (e.g., Pearson's r, Cohen's d)
- Report exact p-values wherever possible alongside the summary statistics and 95% confidence intervals. These should be reported for all key questions and not only when the p-value is less than 0.05.

Please outline where this information can be found within the submission (e.g., sections or figure legends), or explain why this information doesn't apply to your submission:

We describe the statistical methodology in the Methods section titled "Abundance regression modeling"

(For large

datasets, or papers with a very large number of statistical tests, you may upload a single table file with tests, Ns, etc., with reference to sections in the manuscript.)

## Group allocation

- Indicate how samples were allocated into experimental groups (in the case of clinical studies, please specify allocation to treatment method); if randomization was used, please also state if restricted randomization was applied
- Indicate if masking was used during group allocation, data collection and/or data analysis

Please outline where this information can be found within the submission (e.g., sections or figure legends), or explain why this information doesn't apply to your submission:

Samples were evaluated based on sample covariates.

## Additional data files ("source data")

- We encourage you to upload relevant additional data files, such as numerical data that are represented as a graph in a figure, or as a summary table
- Where provided, these should be in the most useful format, and they can be uploaded as "Source data" files linked to a main figure or table
- Include model definition files including the full list of parameters used
- Include code used for data analysis (e.g., R, MatLab)
- Avoid stating that data files are "available upon request"

Please indicate the figures or tables for which source data files have been provided:

We have uploaded numerical data used to generate figures 2,3,4,6,7,8,9,10,11,12, and 13. Additionally, relevant data files are provided in supporting file tables 1a-1i, found in Supporting File 1. In addition to the documentation (<https://tcrdist3.readthedocs.io/>) of our open-source package tcrdist3 (<https://github.com/kmayerb/tcrdist3>), we have made available a set of executable .py and .R scripts (<https://github.com/kmayerb/tcrdist3-ms>) that can be referenced for reproducing the manuscript's core data analyses, including meta-clonotype discovery from antigen-associated data, tabulation of meta-clonotype conformant sequences in bulk TCR repertoires, and estimation of coefficients in beta-binomial regressions models. These files include the full model definition and list of parameters used.
